# Supplementary material for: Whole-cell microtiter plate screening assay for terminal hydroxylation of fatty acids by P450s
Source: Royal Society of Chemistry journal article supplement (doi:10.1039/c6cc01749e), 2016-01-01
Supplement: c6cc01749e1.pdf [file c6cc01749e1.pdf]

## Supporting Information

### Whole-cell microtiter plate screening assay for terminal hydroxylation of fatty acids by P450s

Martin J. Weissenborn,<sup>§a</sup> Sandra Notonier,<sup>§a</sup> Sarah-Luise Lang,<sup>a</sup> Konrad B. Otte,<sup>a</sup> Susanne Herter,<sup>b</sup>  
Nicholas J. Turner,<sup>b</sup> Sabine L. Flitsch<sup>b</sup> and Bernhard Hauer<sup>\*a</sup>

<sup>a</sup>Institute of Technical Biochemistry, Universitaet Stuttgart, Allmandring 31, 70569 Stuttgart, Germany

<sup>b</sup>Manchester Institute of Biotechnology & School of Chemistry, University of Manchester, 131 Princess Street, M1 7DN Manchester, United Kingdom

\*E-mail [bernhard.hauer@itb.uni-stuttgart.de](mailto:bernhard.hauer@itb.uni-stuttgart.de)

<sup>§</sup> These authors contributed equally to the work

#### Table of contents

|                                                                                                                             |          |
|-----------------------------------------------------------------------------------------------------------------------------|----------|
| <b>Material and Method .....</b>                                                                                            | <b>2</b> |
| 1. Chemicals, bacterial strains and plasmids.....                                                                           | 2        |
| 2. Sequence alignments and designed primers .....                                                                           | 2        |
| 3. Fermentation, galactose oxidase expression and purification.....                                                         | 3        |
| 4. CYP153A <sub>M.aq</sub> -CPR <sub>BM3</sub> expression, whole resting cell preparation and biocatalytic performance .... | 3        |
| 4.1. Bacterial cell fermentation and P450 expression.....                                                                   | 3        |
| 4.2. Lysate preparation and <i>in vitro</i> performance .....                                                               | 3        |
| 4.3. Whole resting cell biotransformation.....                                                                              | 4        |
| 5. Galactose oxidase assay .....                                                                                            | 4        |
| 6. CO spectra.....                                                                                                          | 4        |
| 7. GC-FID analysis .....                                                                                                    | 4        |
| <b>Supporting tables and figures .....</b>                                                                                  | <b>5</b> |
| 1. Galactose oxidase substrates panel .....                                                                                 | 5        |
| 2. Heating step .....                                                                                                       | 5        |
| 3. ω-OHC <sub>12</sub> detection limit .....                                                                                | 6        |
| 4. Controls.....                                                                                                            | 6        |
| 5. Selectivity of the GOase <sub>M3-5</sub> .....                                                                           | 7        |
| 6. Small focussed mutant library .....                                                                                      | 7        |
| <b>References .....</b>                                                                                                     | <b>8</b> |

## Material and Method

### 1. Chemicals, bacterial strains and plasmids

Yeast extract, agar and tryptone were purchased from Roth (Germany), fatty acids (substrate and product  $\omega$ -OHFA) and all other chemicals were acquired from Sigma-Aldrich (Germany). *E. coli* strain BL21 (DE3) was purchased from Novagen (Madison, WI, USA). The plasmid pET-30 containing the galactose oxidase mutant  $M_{3-5}$  (GOase $_{M_{3-5}}$ ) gene was kindly provided by the Manchester Institute of Biotechnology, University of Manchester.<sup>1</sup> The plasmid pET-28a(+) (Novagen, Madison, WI, USA) with P450 $_{BM3}$  from *Bacillus megaterium* and pET-28a(+) harbouring the fusion construct between the heme domain of CYP153A from *Marinobacter aquaeolei* and the reductase domain of P450 $_{BM3}$  (CYP153A $_{M.aq}$ -CPR $_{BM3}$ ) wild type and each variant from the mutant library were generated at the University of Stuttgart.<sup>2</sup>

### 2. Sequence alignments and designed primers

The substitutions selected for mutagenesis were based on amino acids frequencies deriving from conservation analysis in CYPs families.<sup>3,4</sup> Site-directed mutagenesis was performed by QuikChange method to generate the small focussed library.

**Table S1.** Designed primers for the generation of a small-focussed mutant library

| Variants | Primers            | Sequences (5'--> 3')                                                                                                     |
|----------|--------------------|--------------------------------------------------------------------------------------------------------------------------|
| V306I    | Forward<br>Reverse | ctg ctc ata <u>ATT</u> ggc ggc aac gat acg acg<br>cgt cgt atc gtt gcc gcc <u>AAT</u> tat gac cag                         |
| G307R    | Forward<br>Reverse | ctg ctc ata gtc <u>CGT</u> ggc aac gat acg acg<br>cgt cgt atc gtt gcc <u>ACG</u> gac tat gag cag                         |
| F455V    | Forward<br>Reverse | cgg gtg cag tcc aac <u>GTG</u> gtg cgg ggc tat<br>ata gcc ccg cac <u>CAC</u> gtt gga ctg cac ccg                         |
| D134V    | Forward<br>Reverse | ccg caa atc att ctc ggt <u>GTG</u> cct ccg gag ggg ctg tcg<br>cga cag ccc ctc cgg agg <u>CAC</u> acc gag aat gat ttg cgc |
| I145L    | Forward<br>Reverse | gaa atg ttc <u>CTG</u> gcg atg gat ccg ccg<br>cgg cgg atc cat cgc <u>CAG</u> gaa cat ttc                                 |
| S453A    | Forward<br>Reverse | cgg gtg cag <u>GCG</u> aac ttc gtg cgg ggc tat<br>ata gcc ccg cac gaa gtt <u>CGC</u> ctg cac ccg                         |

The PCR mixture contained: DNA polymerase buffer with MgSO<sub>4</sub> 10X (1X, 5  $\mu$ L), forward/reverse primer (10 pmol, 1  $\mu$ L each), DNTP mix (50 mM, 1  $\mu$ L), plasmid template (100 ng, 2  $\mu$ L), *pfu* Ultra II polymerase enzyme (1  $\mu$ L) and sterile water to a final volume of 50  $\mu$ L. The PCR program included:

- 1) Denaturation: 95 °C, 2 min
  - 2) Denaturation: 95 °C, 30 sec
  - 3) Annealing: 55 °C, 60 sec
  - 4) Extension: 72°C, 4 min  
(30 sec/kb of plasmid length)
  - 5) Final extension: 72°C, 7 min
  - 6) Storage at 8 °C
- } x 18 cycles

Following the PCR, the mixtures were treated for 2 h at 37 °C (digestion step) with 1  $\mu\text{L}$  of *Dpn I* restriction enzyme (Fermentas, Darmstadt, Germany), and subsequently purified and concentrated by a ZymoClean DNA concentrator kit prior to a chemical transformation into *E. coli* DH5 $\alpha$  cells.

### **3. Fermentation, galactose oxidase expression and purification**

GOase<sub>M3-5</sub> was transformed into *E. coli* BL21 Star<sup>TM</sup> (DE3) cells (Invitrogen) according to manufacturer's specifications. A single colony was picked from an overnight LB plate containing 1  $\mu\text{L}$  of kanamycin of a 30 mg mL<sup>-1</sup> stock solution per mL of agar and used to inoculate 5 mL LB medium supplemented with 5  $\mu\text{L}$  kanamycin and grown overnight at 37 °C and 250 rpm. 500  $\mu\text{L}$  of the overnight culture was used to inoculate 250 mL of an auto-induction medium (8ZY-4LAC)<sup>5</sup> and supplemented with 250  $\mu\text{L}$  of kanamycin in a 2-L-baffled Erlenmeyer flask. The cells were grown at 26 °C and 250 rpm for 60 h. Cells were harvested by centrifugation at 8967 g and 4 °C for 20 min and subsequently prepared for protein purification. The protein purification was accomplished on ÄKTA purifier 10 (GE Healthcare Biosciences, Uppsala, Sweden) using a Strep-Tag-II column as described elsewhere.<sup>5</sup>

### **4. CYP153A<sub>M.aq</sub>-CPR<sub>BM3</sub> expression, whole resting cell preparation and biocatalytic performance**

#### **4.1. Bacterial cell fermentation and P450 expression**

For overnight cultures, a fresh *E. coli* transformant was used to inoculate 5 mL of LB medium (30  $\mu\text{g mL}^{-1}$  of kanamycin) and 100  $\mu\text{L}$  were used to carry out a protein expression in 2 mL TB medium containing 2  $\mu\text{L}$  kanamycin in 24-deep well plates. The cells were grown at 37 °C and 180 rpm on a plate shaker until an OD<sub>600nm</sub> of 0.8-1 and the plates were covered with a plate sealer (Greiner Bio-One, Frickenhausen, Germany). For protein induction, 0.1 mM of IPTG, 0.5 mM of 5-aminolevulinic acid and 0.5 mM of FeCl<sub>3</sub> were added and the protein expression performed at 25 °C and 180 rpm for 10-16 h.

#### **4.2. Lysate preparation and *in vitro* performance**

For the preparation of cell extract subsequently after the protein expression, the cells were centrifuged (2752 g, 4 °C, 20 min) and the pellet resuspended in potassium phosphate buffer, 100 mM pH 7.4. The cells were lysed by sonication on ice (3x2 min, 1 min interval, 40 % amplitude, 0.35 s cycle time (Branson Sonifier 250, Schwäbisch Gmünd, Germany)) and centrifuged for removal of cells debris (34864 g, 45 min, 4 °C). A screen of activities in lysate was performed in 100 mM potassium phosphate buffer pH 7.4 with 1 mM of dodecanoic acid (C<sub>12</sub>), 5 % DMSO (v/v), 1 mM NADPH, cofactor regeneration, and 0.5  $\mu\text{M}$  of lysate for 2 h at 30 °C.

### 4.3. Whole resting cell biotransformation

To perform whole resting cell biotransformations consequently after the protein expression the plates were centrifuged for 10 min at 2752  $g$  and 4 °C. The medium was discarded and the cell pellets washed once with 2 mL of 100 mM potassium phosphate buffer pH 7.4. After centrifugation at 3000  $g$  for 3 min, the cell pellets were resuspended in the same buffer to reach 100  $g_{\text{cww}} \text{ L}^{-1}$  (corresponding to 1-2 mL buffer added). The biotransformations were performed with 1 mL of 50  $g_{\text{cww}} \text{ L}^{-1}$  resting cells in the presence of  $\text{C}_{12}$  and product 12-hydroxydodecanoic acid ( $\omega\text{-OHC}_{12}$ ), 5 % DMSO (v/v, not exceeding the solubility limit), for 2 h at 25 °C and 500 rpm. Negative controls were accomplished in the same fashion with the same concentration of organic co-solvent added. The reactions were stopped by centrifugation for 3 min at 3000  $g$  and the supernatant was stored at -20 °C until further analysis.

### 5. Galactose oxidase assay

Prior to the GOase based assay, the cell-free supernatants from P450-catalysed reactions were treated at 90 °C for 30 min in order to deactivate potential additional metabolic activity. The GOase assay was accomplished in 96-well plates (Greiner Bio-One GmbH, Frickenhausen, Germany) in a final volume of 200  $\mu\text{L}$ . To each well was added: 118  $\mu\text{L}$  of the heat-treated supernatant, 1  $\mu\text{L}$  of commercially available horseradish peroxidase (HRP, from 9000 units  $\mu\text{L}^{-1}$ ), 8  $\mu\text{L}$  of 2,2'-azino-bis(3-ethylbenzothiazoline-6-sulphonic acid) (ABTS, from 10 mM stock), 10  $\mu\text{L}$  of GOase<sub>M3-5</sub> (stock solution of 3.5-8  $\mu\text{M mL}^{-1}$ ) and 100 mM potassium phosphate buffer pH 7.4. Plates were read immediately for up to 4 h using a plate reader (POLARstar Omega BMG Labtech, Ortenberg, Germany). The formation of ABTS<sup>ox</sup> ( $\epsilon = 3.6 \times 10^4 \text{ M}^{-1} \text{ cm}^{-1}$ ) was monitored at  $\lambda = 420 \text{ nm}$ , taking the linear and early part of the graphs ( $V_{\text{max}}$ , where there is no limiting substrate). One unit of GOase<sub>M3-5</sub> is defined as the amount of protein that oxidises 1  $\mu\text{mol}$  of substrate per minute at 30 °C.

### 6. CO spectra

The P450 protein concentration in whole cells was determined as described previously.<sup>6,7</sup> One spatula of sodium dithionite was added to the sample prior to incubation on ice for 30 min ensuring a complete reduction of the heme domain. Subsequently, CO gas (except for the reference well) was applied to the reduced samples followed by incubation at 4 °C for 1 h. Plates were read on a plate reader in a range of  $\lambda = 400\text{-}500 \text{ nm}$ .

### 7. GC-FID analysis

The samples were extracted twice with the same volume of methyl *ter*-butylether (MTBE). The organic phases were combined and evaporated (GeneVac EZ 2 Plus, Ipswich England). For derivatization, to each sample 45  $\mu\text{L}$  of MTBE and 45  $\mu\text{L}$  of *N,O*-bis(trimethylsilyl)trifluoroacetamide containing 1 % trimethylchlorosilane were added and samples incubated at 70 °C for 30 min. Decanoic acid was used as internal standard for quantification. The

reaction progress was monitored by GC-FID (Shimadzu, Japan) using a Elite-5 column (PerkinElmer, Waltham, MA, USA) and H<sub>2</sub> as carrier gas. For analysis of C<sub>12</sub> fatty acids, the column oven was set at 140 °C for 2 min, then raised to 250 °C at a rate of 10 °C min<sup>-1</sup> for 1 min, held isotherm for 1 min, and then raised to 310 °C at 65 °C min<sup>-1</sup>.

## Supporting tables and figures

### 1. Galactose oxidase substrates panel

**Table S2.** Panel of primary alcohols and hydroxylated fatty acids tested as potential substrates for the GOase based assay.

| Substrate           | OD <sub>420nm</sub> (after 10 min incubation) |
|---------------------|-----------------------------------------------|
| ω-OHC <sub>6</sub>  | 0.03 ± 0.022                                  |
| ω-OHC <sub>8</sub>  | 0.24 ± 0.019                                  |
| ω-OHC <sub>9</sub>  | 0.04 ± 0.0001                                 |
| ω-OHC <sub>10</sub> | 0.18 ± 0.005                                  |
| ω-OHC <sub>12</sub> | 0.10 ± 0.018                                  |
| 1-hexanol           | 0.55 ± 0.069                                  |
| 1-octanol           | 0.40 ± 0.056                                  |
| 1-dodecanol         | 0.15 ± 0.009                                  |

### 2. Heating step

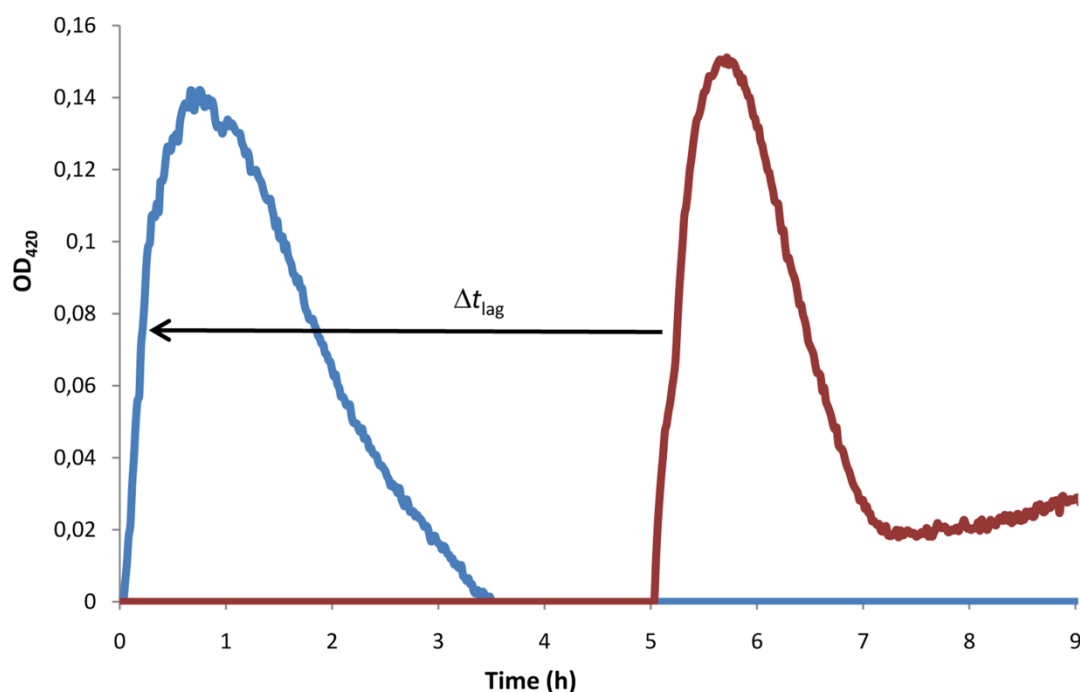

**Figure S1.** Heating step was applied to the supernatant following a 2 h biotransformation of 2 mM of C<sub>12</sub> substrate with resting *E. coli* cells (50 g<sub>cww</sub> L<sup>-1</sup>). This crucial step enables a maximum of absorption displayed after 1 h incubation via the GOase assay (blue curve) compared to 6 h in the absence of the heating step (red curve).

### 3. $\omega$ -OHC<sub>12</sub> detection limit

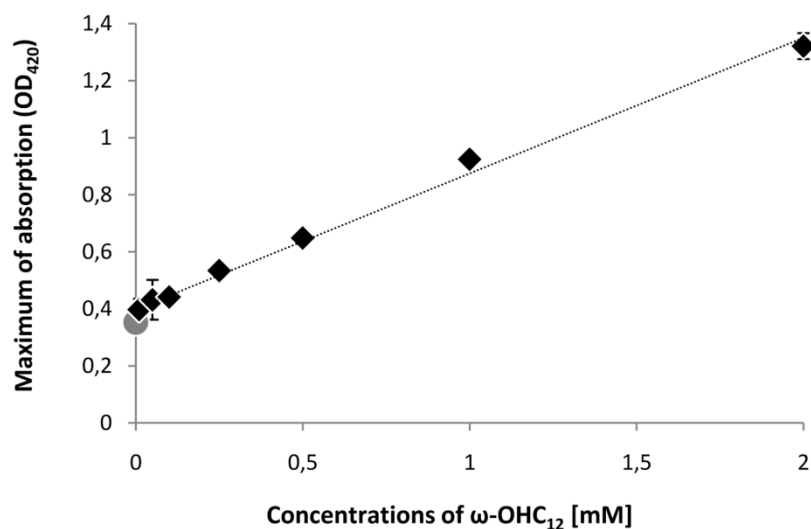

**Figure S2.** Increased concentrations of  $\omega$ -OHC<sub>12</sub> applied to whole resting cell experiments after 2 h. A control assay (replacement of the product by the same volume of DMSO) was also implemented (grey circle). The intensity of the signal recorded via the assay correlates with the GC-FID analysis: a higher intensity of signal equals to a large amount of product formed.

### 4. Controls

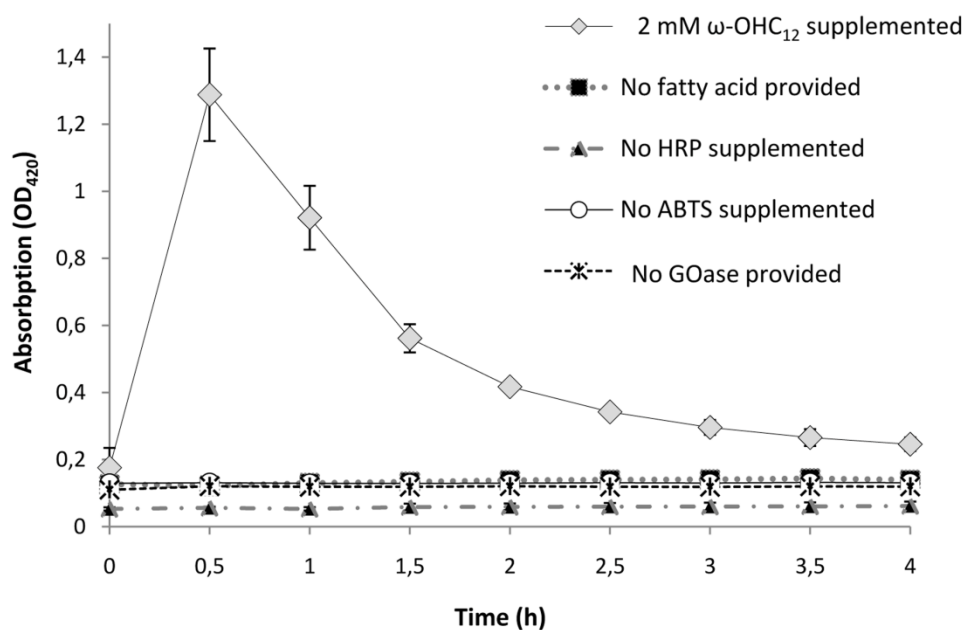

**Figure S3.** Control reactions were tested in the absence of one of the following components: GOase, HRP, ABTS or  $\omega$ -OHC<sub>12</sub> in comparison with a positive control containing each of the above mentioned ingredients. The GOase assay is only valid with the presence of each component.

## 5. Selectivity of the GOase<sub>M3-5</sub>

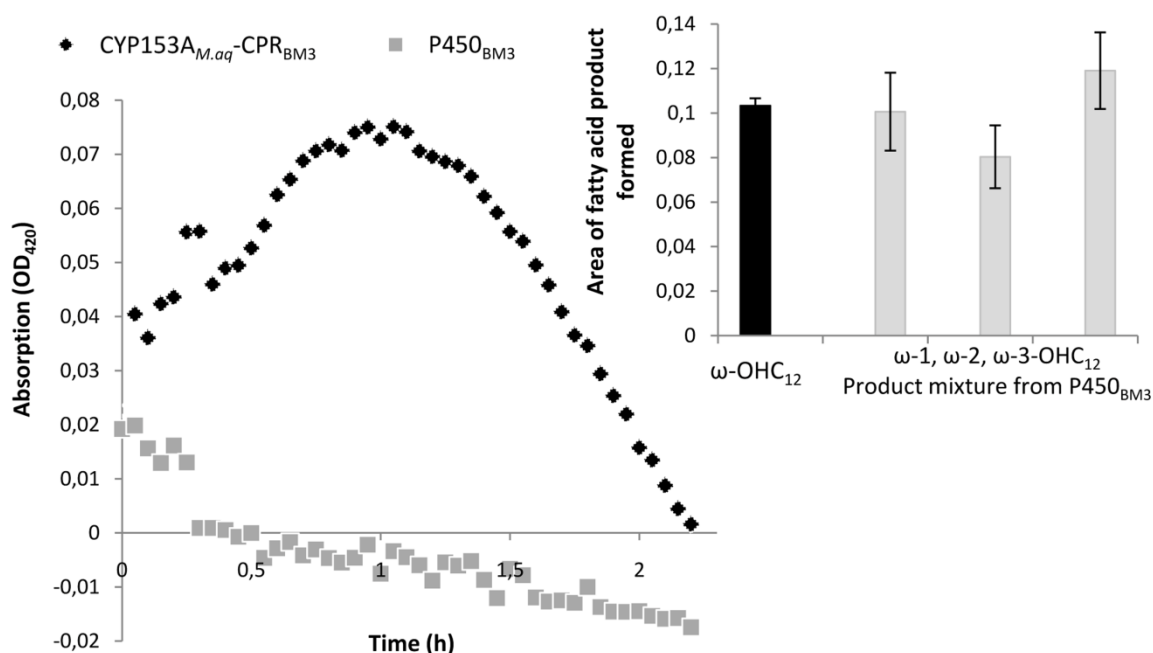

**Figure S4.** Comparison of the product formation between CYP153A<sub>M.aq</sub>-CPR<sub>BM3</sub> and P450<sub>BM3</sub> measured by the GOase assay and after extraction and analysis on GC-FID. Specific activity of the GOase towards  $\omega$ -OHC<sub>12</sub> as a signal of absorption is displayed during the assay only for the product of CYP153A<sub>M.aq</sub>-CPR<sub>BM3</sub>. P450<sub>BM3</sub> was shown active after GC-FID analysis, however the assay does not enable the detection of the product mixture  $\omega$ -1,  $\omega$ -2 and  $\omega$ -3-OHC<sub>12</sub>.

## 6. Small focussed mutant library

**Table S3.** Positions selected for site-directed mutagenesis. The substitutions for the positions located in the active site were selected based on the results from a previous small focussed library targeting the binding pocket only.<sup>8</sup> To expand the diversity three positions from the substrate access tunnel were also addressed for mutation.

| Positions | Location                                     | Selected substitution and frequency | Remarks                                                                                                            |
|-----------|----------------------------------------------|-------------------------------------|--------------------------------------------------------------------------------------------------------------------|
| V306I     | Active site (I-Helix)                        | 14.98 %                             | Position involved in the anchoring of the carboxyl group of the substrate. Substitutions tested in the past: V306T |
| G307R     | Active site (I-Helix)                        | 0.71 %                              | Substitution G307A previously tested leading to the most active variant. Other substitution evaluated: G307V       |
| F455V     | Active site (C-terminal $\beta$ -sheet loop) | 6.73 %                              | Position influencing the substrate orientation to the heme centre. Previous substitutions tested: L, I, Y          |
| D134V     | Substrate entrance                           | 3.18 %                              | Influence of the substrate access tunnel evaluated by replacing with hydrophobic residues                          |
| I145L     | Substrate entrance                           | 24.40 %                             |                                                                                                                    |
| S453A     | Substrate entrance                           | 4.33 %                              |                                                                                                                    |

**Table S4.** The relative conversion and specific conversion of C<sub>12</sub> from MTP and GC-FID as well as the specific activity were calculated for the parent enzyme (WT). The table displays comparisons to G307A set at 100 % and S453A mutants. (AS: active site; SE: substrate entrance, MTP: microtiter plate)

| Mutants | Mutation locations | Rel. conversion MTP-Assay [%] | P450 conc. [μM] | Rel. specific conversion MTP-Assay [%] | Rel. specific conversion GC-FID [%] | Specific activity [μM min <sup>-1</sup> μM <sup>-1</sup> ] |
|---------|--------------------|-------------------------------|-----------------|----------------------------------------|-------------------------------------|------------------------------------------------------------|
| WT      | -                  | 76 ± 0.01                     | 1.2 ± 0.03      | 60 ± 0.01                              | 95 ± 0.04                           | 2.50 ± 0.36                                                |
| G307A   | AS                 | 100                           | 1.3 ± 0.03      | 100                                    | 100                                 | 2.62 ± 0.57                                                |
| S453A   | SE                 | <b>86 ± 0.02</b>              | 0.8 ± 0.14      | <b>119 ± 0.03</b>                      | <b>116 ± 0.03</b>                   | <b>3.06 ± 0.28</b>                                         |

## References

- 1 F. Escalettes and N. J. Turner, *ChemBioChem*, 2008, **9**, 857–860.
- 2 D. Scheps, S. Honda Malca, S. M. Richter, K. Marisch, B. M. Nestl and B. Hauer, *Microbial Biotechnology*, 2013, **6**, 694–707.
- 3 Ł. Gricman, C. Vogel and J. Pleiss, *Proteins: Structure, Function and Bioinformatics*, 2014, **82**, 491–504.
- 4 Ł. Gricman, C. Vogel and J. Pleiss, *Proteins*, 2015, **83**, 1593–1603.
- 5 S. E. Deacon and M. J. McPherson, *ChemBioChem*, 2011, **12**, 593–601.
- 6 T. Omura and R. Sato, *The Journal of biological chemistry*, 1964, **239**, 2370–8.
- 7 Y. Khatri, F. Hannemann, K. M. Ewen, D. Pistorius, O. Perlova, N. Kagawa, A. O. Brachmann, R. Müller and R. Bernhardt, *Chemistry & biology*, 2010, **17**, 1295–305.
- 8 S. Honda Malca, D. Scheps, L. Kühnel, E. Venegas-Venegas, A. Seifert, B. Nestl and B. Hauer, *Chemical Communications*, 2012, **48**, 5115–5117.
